# Supplementary material for: Wnt-5A/B Signaling in Hematopoiesis throughout Life
Source: PubMed Central journal article supplement (PMC7465103; doi:10.3390/cells9081801), 2020-07-29
Supplement: cells-09-01801-s001.pdf [file cells-09-01801-s001.pdf]

Table S1. Surface markers used to characterize cells associated to initial steps of hematopoiesis.

| Cell Type        | Surface Markers                                                                                                                            | Reference                            |
|------------------|--------------------------------------------------------------------------------------------------------------------------------------------|--------------------------------------|
| LT-HSC           | Lin <sup>-</sup> c-Kit <sup>+</sup> Sca1 <sup>+</sup> CD34 <sup>-</sup> Flk2 <sup>-</sup> (mouse)                                          | [19]                                 |
|                  | CD201 <sup>+</sup> CD150 <sup>+</sup> CD48 <sup>-</sup> Lin <sup>-</sup> c-Kit <sup>+</sup> Sca-1 <sup>+</sup> (mouse)                     | Reviewed by Cheng 2020 [140]         |
|                  | CD34 <sup>+</sup> Flk2 <sup>-</sup> Lin <sup>-</sup> c-Kit <sup>+</sup> Sca-1 <sup>+</sup> (mouse)                                         | Reviewed by Cheng 2020 [140]         |
|                  | Lin <sup>-</sup> c-Kit <sup>+</sup> Sca-1 <sup>+</sup> Flk2 <sup>-</sup> CD34 <sup>-</sup> Slamf1 <sup>+</sup> (mouse)                     | Reviewed by Chotinantakul 2012 [141] |
|                  | Lin <sup>-</sup> CD34 <sup>+</sup> CD38 <sup>-</sup> CD90 <sup>+/-</sup> CD45RA <sup>-</sup> CD49f <sup>+</sup> Rho <sup>low</sup> (human) | Reviewed by Chotinantakul 2012 [141] |
| ST-HSC           | CD34 <sup>+</sup> Flk2 <sup>-</sup> Lin <sup>-</sup> c-Kit <sup>+</sup> Sca-1 <sup>+</sup> (mouse)                                         | Reviewed by Cheng 2020 [140]         |
|                  | Lin <sup>-</sup> c-Kit <sup>+</sup> Sca-1 <sup>+</sup> Flk2 <sup>-</sup> CD34 <sup>+</sup> Slamf1 <sup>+</sup> (mouse)                     | Reviewed by Chotinantakul 2012 [141] |
|                  | Lin <sup>-</sup> CD34 <sup>+</sup> CD38 <sup>-</sup> CD90 <sup>+/-</sup> CD45RA <sup>-</sup> CD49f <sup>+</sup> Rho <sup>-</sup> (human)   | Reviewed by Chotinantakul 2012 [141] |
| HSC (in general) | CD34 <sup>+</sup> CD38 <sup>-</sup> Thy1 <sup>-</sup> CD45RA <sup>-</sup> CD49f <sup>+</sup> (human)                                       | [17]                                 |
|                  | CD34 <sup>+</sup> CD38 <sup>-</sup> Thy-1 <sup>+</sup> CD45RA <sup>-</sup> Flt3 <sup>+</sup> CD7 <sup>-</sup> CD10 <sup>-</sup> (human)    | [20]                                 |
| MPP              | CD34 <sup>+</sup> CD38 <sup>-</sup> Thy1 <sup>-</sup> CD45RA <sup>-</sup> CD49f <sup>-</sup> (human)                                       | [17]                                 |
|                  | CD34 <sup>+</sup> CD38 <sup>-</sup> Thy-1 <sup>-</sup> CD45RA <sup>-</sup> Flt3 <sup>+</sup> CD7 <sup>-</sup> CD10 <sup>-</sup> (human)    | [20]                                 |
|                  | CD34 <sup>+</sup> Flk2 <sup>+</sup> Lin <sup>-</sup> c-Kit <sup>+</sup> Sca-1 <sup>+</sup> (mouse)                                         | Reviewed by Cheng 2020 [140]         |
|                  | CD150 <sup>-</sup> CD48 <sup>-</sup> Lin <sup>-</sup> c-Kit <sup>+</sup> Sca-1 <sup>+</sup> (mouse)                                        | Reviewed by Cheng 2020 [140]         |
|                  | Lin <sup>-</sup> c-Kit <sup>+</sup> Sca-1 <sup>+</sup> Flk2 <sup>+</sup> CD34 <sup>+</sup> Slamf1 <sup>-</sup> (mouse)                     | Reviewed by Chotinantakul 2012 [141] |
| CLP              | CD34 <sup>+</sup> CD10 <sup>+</sup> CD24 <sup>-</sup> (human)                                                                              | [142]                                |
|                  | Lin <sup>-</sup> CD34 <sup>+</sup> CD38 <sup>+</sup> CD10 <sup>+</sup> (human)                                                             | Reviewed by Chotinantakul 2012 [141] |
|                  | Lin <sup>-</sup> Flk2 <sup>+</sup> IL7R $\alpha$ <sup>+</sup> CD27 <sup>+</sup> (mouse)                                                    | Reviewed by Chotinantakul 2012 [141] |
|                  | Lin <sup>-</sup> c-Kit <sup>low</sup> Sca-1 <sup>low</sup> IL7R $\alpha$ <sup>+</sup> Flk2 <sup>+</sup> (mouse)                            | Reviewed by Cheng 2020 [140]         |
| CMP              | CD34 <sup>+</sup> CD38 <sup>+</sup> CD10 <sup>-</sup> FLT3 <sup>+</sup> CD45RA <sup>-</sup> (human)                                        | [17]                                 |
|                  | CD34 <sup>+</sup> CD38 <sup>+</sup> Thy-1 <sup>-</sup> CD45RA <sup>-</sup> Flt3 <sup>+</sup> CD7 <sup>-</sup> CD10 <sup>-</sup> (mouse)    | [20]                                 |
|                  | CD34 <sup>+</sup> CD38 <sup>+</sup> IL-3R $\alpha$ <sup>+</sup> CD45RA <sup>-</sup> (human)                                                | [143]                                |
|                  | CD34 <sup>+</sup> Fc $\gamma$ RII/III <sup>low</sup> Lin <sup>-</sup> c-Kit <sup>+</sup> Sca-1 <sup>-</sup> (mouse)                        | Reviewed by Cheng 2020 [140]         |
|                  | Lin <sup>-</sup> CD34 <sup>+</sup> CD38 <sup>+</sup> IL3R $\alpha$ <sup>low</sup> CD45RA <sup>-</sup> (human)                              | Reviewed by Chotinantakul 2012 [141] |
|                  | Lin <sup>-</sup> c-Kit <sup>+</sup> Sca-1 <sup>-/low</sup> CD34 <sup>+</sup> Fc $\gamma$ R <sup>low</sup> (mouse)                          | Reviewed by Chotinantakul 2012 [141] |
